# Supplementary material
Source: publisher figshare collection journal article supplement (https://acs.figshare.com/ndownloader/files/3977929)
Supplement: Supplementary file 1 [file 3977929]

## Supporting Information

### Selective Photoinduced Ligand Exchange in a New Tris-Heteroleptic Ru(II) Complex

Bryan A. Albani, Christopher B. Durr, and Claudia Turro\*

*Department of Chemistry and Biochemistry, The Ohio State University, Columbus, Ohio 43210*

#### 1. X-ray Crystallography

**Table S1.** Crystallographic data for **1**) [Ru(biq)(phen)(CH<sub>3</sub>CN)<sub>2</sub>](PF<sub>6</sub>)<sub>2</sub> and **6**) the isolated intermediate [Ru(biq)(phen)(CH<sub>3</sub>CN)(py)](PF<sub>6</sub>)<sub>2</sub>

| Compound                                           | <b>1</b>                                                                         | <b>6</b>                                                                                |
|----------------------------------------------------|----------------------------------------------------------------------------------|-----------------------------------------------------------------------------------------|
| chemical formula                                   | C <sub>34</sub> H <sub>26</sub> F <sub>12</sub> N <sub>6</sub> P <sub>2</sub> Ru | C <sub>41.55</sub> H <sub>38.36</sub> F <sub>12</sub> N <sub>6</sub> OP <sub>2</sub> Ru |
| formula weight                                     | 909.62                                                                           | 1028.75                                                                                 |
| temp (K)                                           | 150(2)                                                                           | 150(2)                                                                                  |
| space group                                        | Triclinic, P-1                                                                   | Triclinic, P-1                                                                          |
| <i>a</i> (Å)                                       | 10.2377(2)                                                                       | 9.9878(3)                                                                               |
| <i>b</i> (Å)                                       | 11.7776(2)                                                                       | 11.8660(3)                                                                              |
| <i>c</i> (Å)                                       | 15.0852(2)                                                                       | 18.5529(4)                                                                              |
| $\alpha$ (°)                                       | 98.004(1)                                                                        | 98.583(2)                                                                               |
| $\beta$ (°)                                        | 99.653(1)                                                                        | 92.110(2)                                                                               |
| $\gamma$ (°)                                       | 97.468(1)                                                                        | 99.059(1)                                                                               |
| <i>V</i> (Å <sup>3</sup> )                         | 1753.65(5)                                                                       | 2142.96(10)                                                                             |
| <i>Z</i>                                           | 2                                                                                | 2                                                                                       |
| <i>D</i> <sub>calcd</sub> (Mg/m <sup>3</sup> )     | 1.723                                                                            | 1.594                                                                                   |
| Crystal Size (mm)                                  | 0.38 X 0.23 X 0.15                                                               | 0.22 X 0.38 X 0.38                                                                      |
| Theta range for data collection                    | 1.77 to 27.42°                                                                   | 1.1 to 27.4                                                                             |
| $\mu$ , (Mo, K $\alpha$ ) (mm <sup>-1</sup> )      | 0.639                                                                            | 0.535                                                                                   |
| <i>F</i> (000)                                     | 908                                                                              | 1039                                                                                    |
| Reflections collected                              | 50939                                                                            | 39398                                                                                   |
| Unique reflections                                 | 7967 [R(int)= 0.028]                                                             | 9727 [R(int) = 0.034]                                                                   |
| Completeness to theta max                          | 99.7%                                                                            | 99.7%                                                                                   |
| Data/restraints/parameters                         | 7967 / 0 / 498                                                                   | 9727 / 139 / 639                                                                        |
| <i>R</i> <sup>1</sup> <sub>a</sub> (%) (all data)  | 4.79 (5.68)                                                                      | 5.52 (7.7)                                                                              |
| <i>wR</i> <sup>2</sup> <sub>b</sub> (%) (all data) | 13.61 (14.65)                                                                    | 15.69 (17.82)                                                                           |
| Goodness-of-fit on <i>F</i> <sup>2</sup>           | 1.124                                                                            | 1.138                                                                                   |
| Largest diff. peak and hole (e Å <sup>-3</sup> )   | 1.300 and -0.642                                                                 | 2.165 and -0.927                                                                        |

$$^a R1 = \frac{\sum ||F_o| - |F_c||}{\sum |F_o|} \times 100$$

$$^b wR2 = [\sum w (F_o^2 - F_c^2)^2 / \sum (w |F_o|^2)]^{1/2} \times 100$$

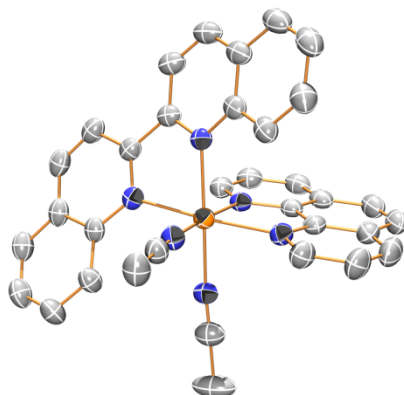

**Figure S1.** ORTEP plot of complex **1**, [Ru(biq)(phen)(CH<sub>3</sub>CN<sub>2</sub>)(PF<sub>6</sub>)<sub>2</sub>] (all ellipsoids drawn at 50% probability).

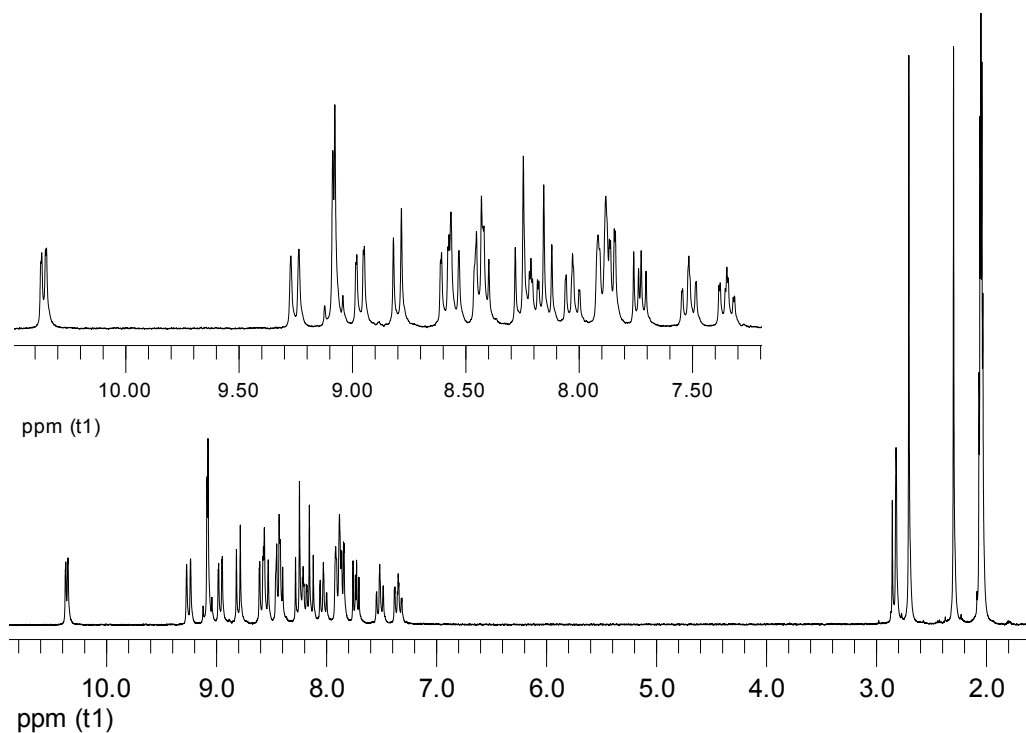

**Figure S2.** <sup>1</sup>H NMR spectrum of **1** in (CD<sub>3</sub>)<sub>2</sub>CO. The singlets at 2.3 and 2.7 ppm correspond to the two types of bound acetonitriles. The resonance at ~2.84 ppm corresponds to residual water.

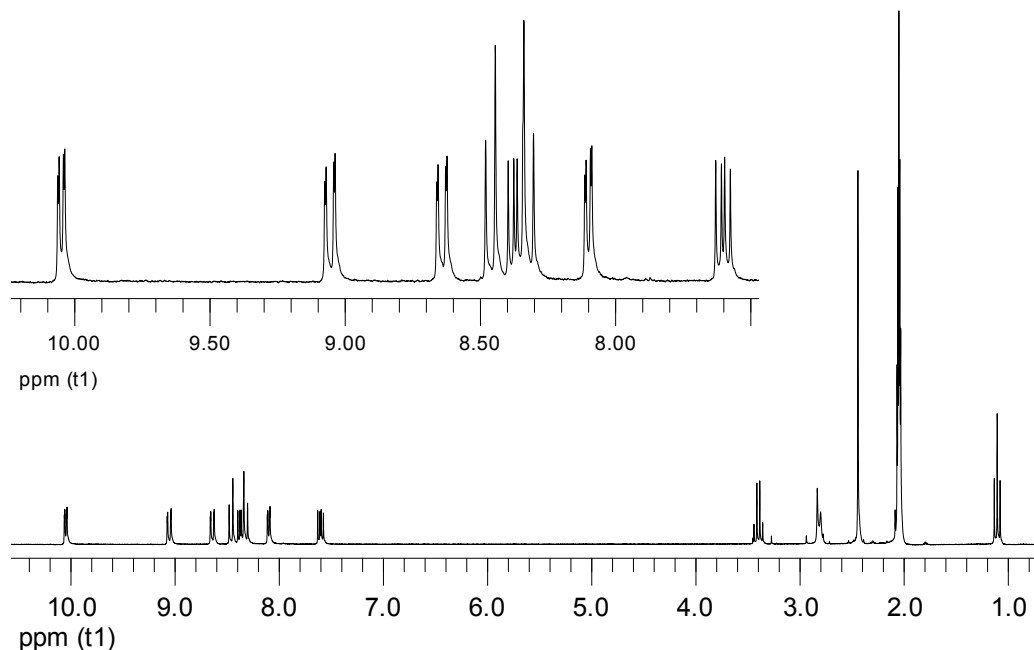

**Figure S3.**  $^1\text{H}$  NMR spectrum of **2** in  $(\text{CD}_3)_2\text{CO}$ . The resonance at 2.45 ppm integrates to six protons corresponding to both bound acetonitriles. Residual ether solvent peaks appear at 1.1 and 3.4 ppm as well as water at  $\sim 2.8$  ppm.

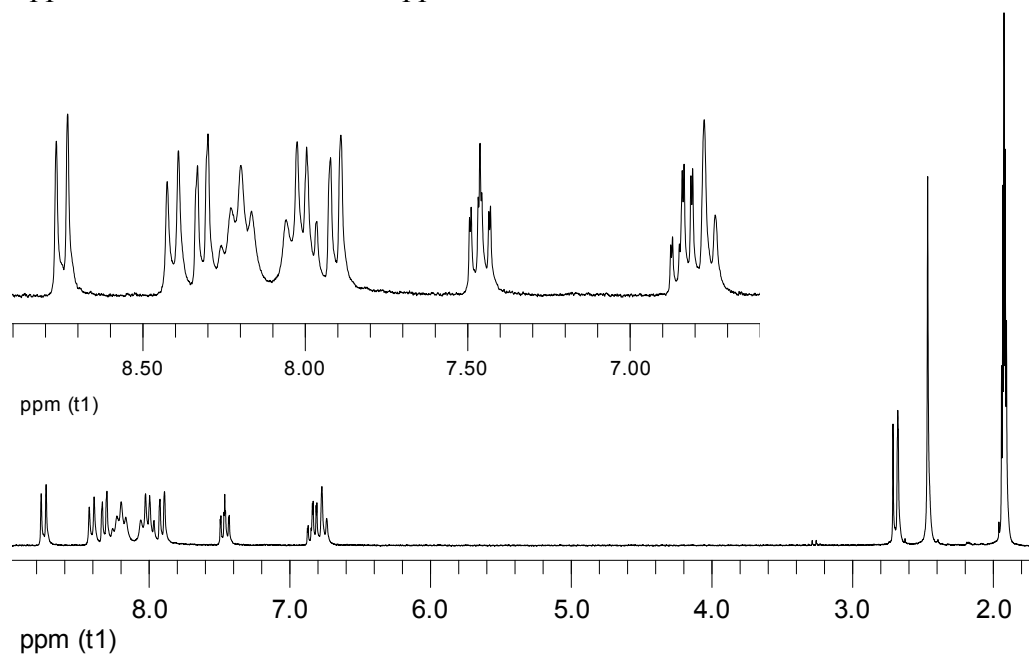

**Figure S4.**  $^1\text{H}$  NMR spectrum of **3** in  $(\text{CD}_3)_2\text{CO}$ . The resonance at 2.45 ppm integrates to six protons corresponding to both bound acetonitriles.

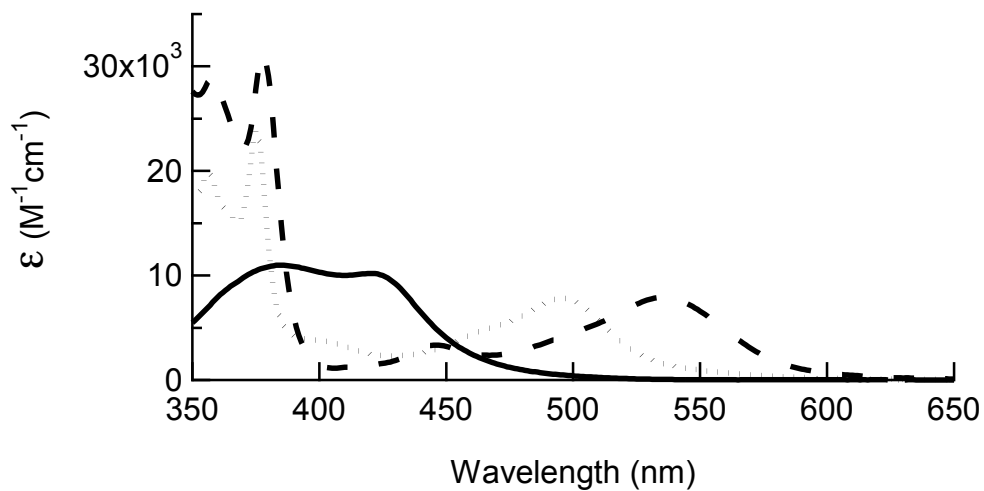

**Figure S5.** Electronic absorption spectra in CH<sub>3</sub>CN of **1** (.....), **2** (—), and **3** (— -).

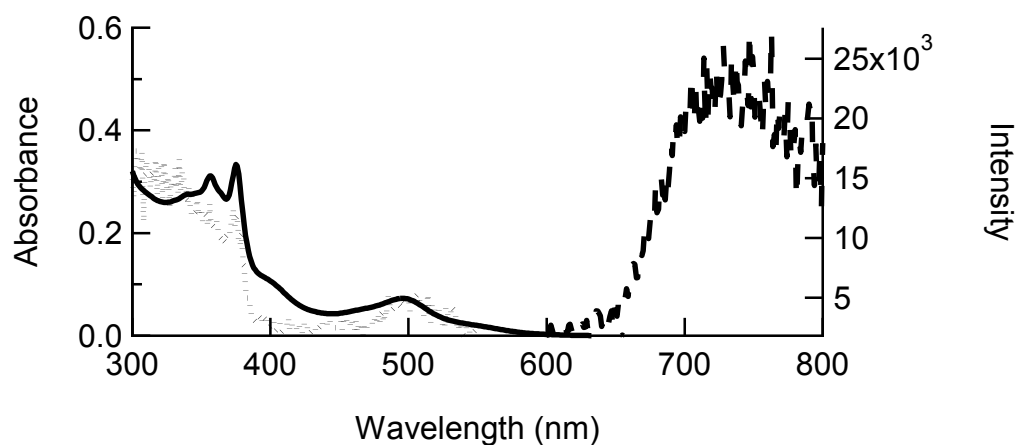

**Figure S6.** Absorption (—), emission ( $\lambda_{\text{ex}} = 500$  nm, — -), and excitation ( $\lambda_{\text{em}} = 740$  nm, ..... ) spectra of **1** (10  $\mu\text{M}$ ) in CH<sub>3</sub>CN at room temperature.

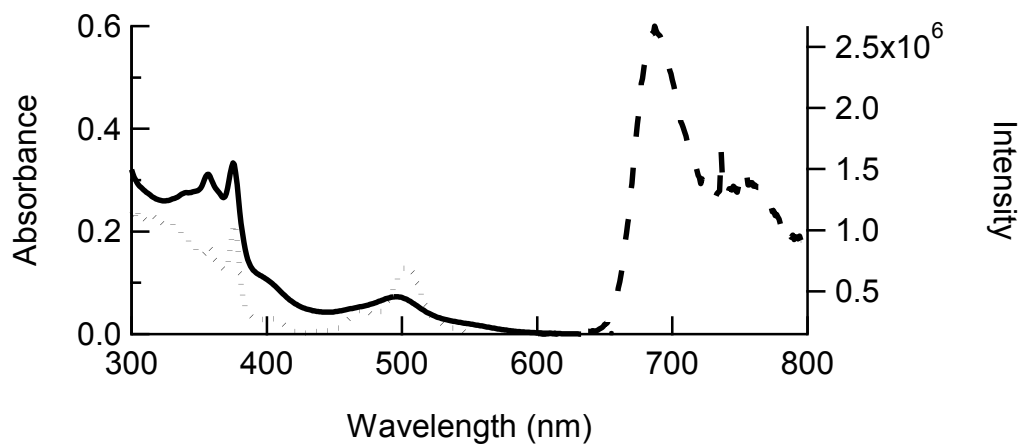

**Figure 7.** Absorption ( — ), emission ( $\lambda_{\text{ex}} = 500$  nm, - - ), and excitation ( $\lambda_{\text{em}} = 740$  nm, ..... ) spectra of **1** (10  $\mu\text{M}$ ) in  $\text{CH}_3\text{CN}$  at 77 K.

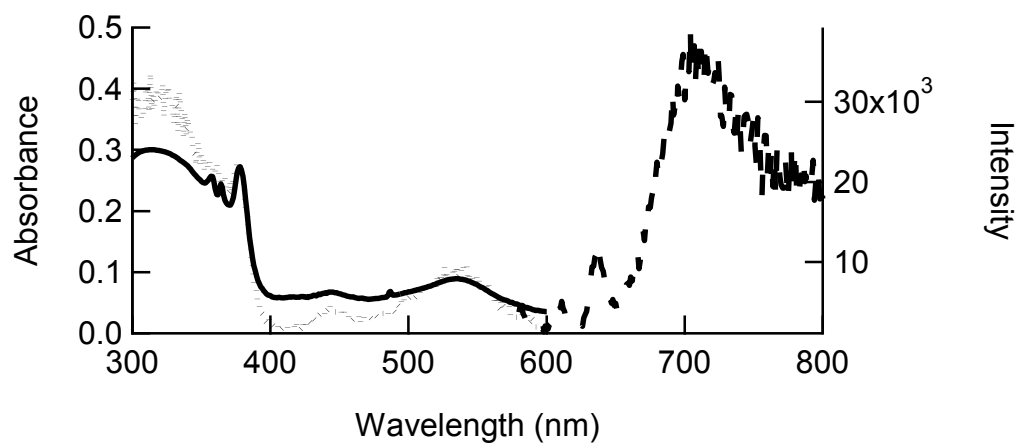

**Figure S8.** Absorption ( — ), emission ( $\lambda_{\text{ex}} = 535$  nm, - - ), and excitation ( $\lambda_{\text{em}} = 700$  nm, ..... ) spectra of **3** (10  $\mu\text{M}$ ) in  $\text{CH}_3\text{CN}$  at room temperature.

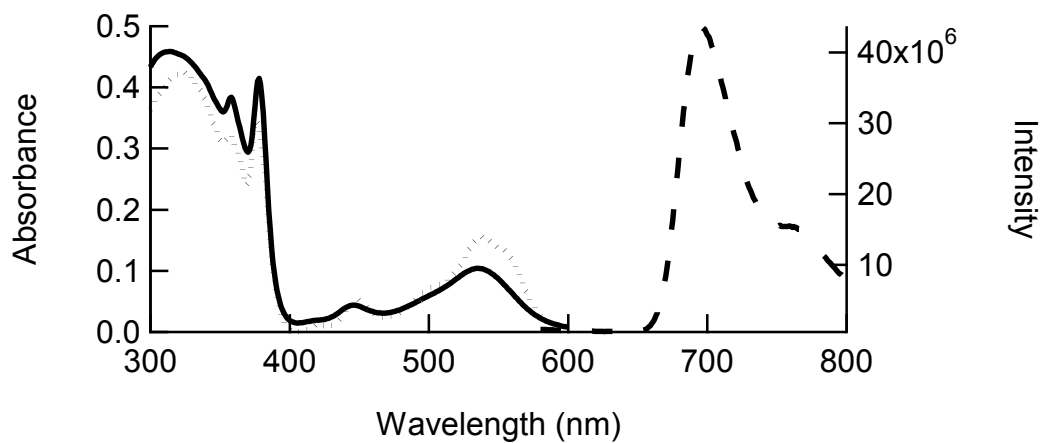

**Figure S9.** Absorption ( — ), emission ( $\lambda_{\text{ex}} = 535 \text{ nm}$ , - - ), and excitation ( $\lambda_{\text{em}} = 700 \text{ nm}$ , ..... ) spectra of **3** ( $10 \mu\text{M}$ ) in  $\text{CH}_3\text{CN}$  at  $77 \text{ K}$

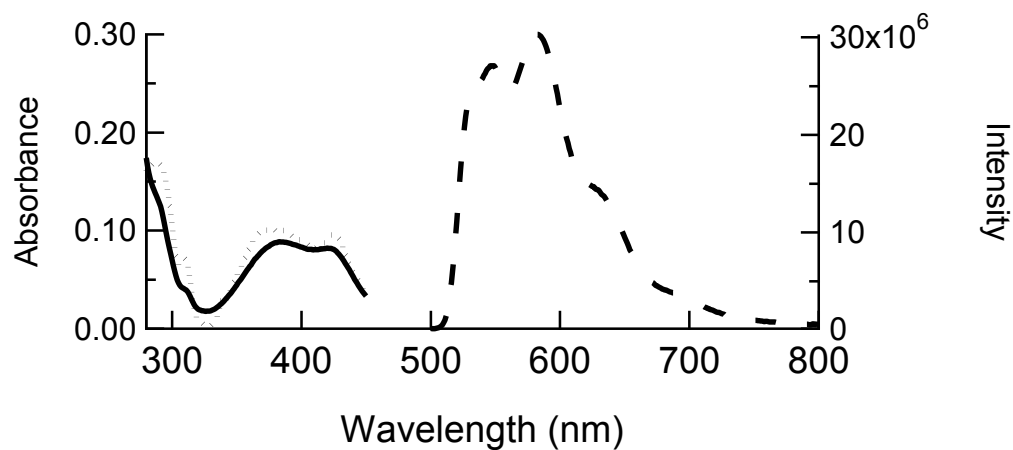

**Figure S10.** Absorption ( — ), emission ( $\lambda_{\text{ex}} = 535 \text{ nm}$ , - - ), and excitation ( $\lambda_{\text{em}} = 700 \text{ nm}$ , ..... ) spectra of **2** ( $10 \mu\text{M}$ ) in  $\text{CH}_3\text{CN}$  at  $77 \text{ K}$ .

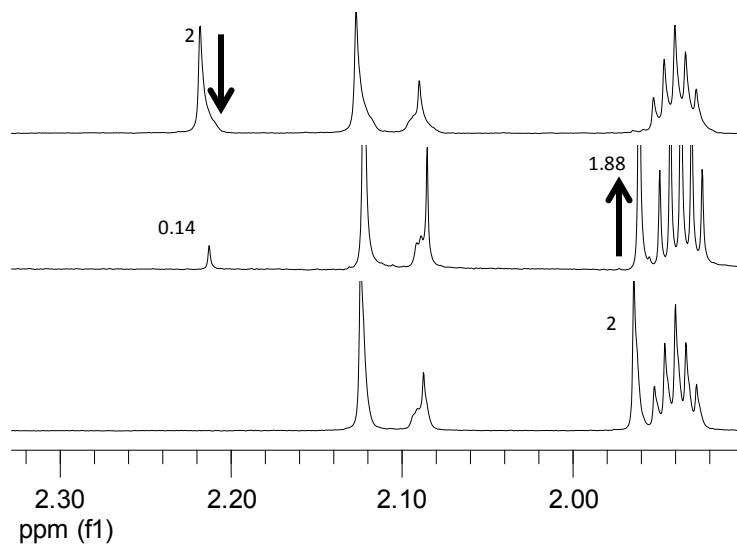

**Figure S11.** Photolysis of **2** monitored by  $^1\text{H}$  NMR spectroscopy in  $\text{CD}_3\text{CN}$   $\lambda_{\text{irr}} \geq 455$  nm at 0, 5, and 20 minutes. Integrations relative to a benzene internal standard are listed next to the corresponding peaks. The resonance at 2.13 ppm and 2.09 ppm correspond to residual water and acetone, respectively, and the singlet growing in at 1.96 ppm corresponds to free  $\text{CH}_3\text{CN}$  in solution.

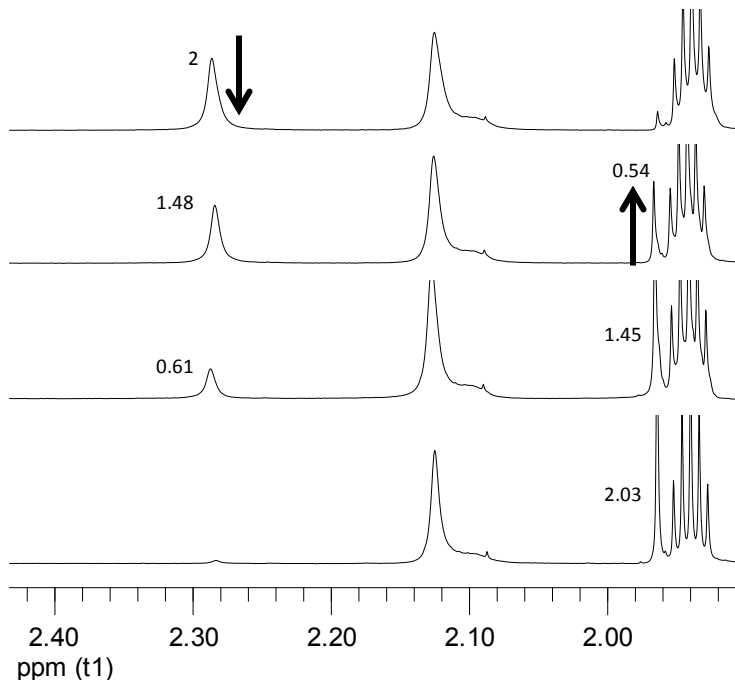

**Figure S12.** Photolysis of **3** monitored by  $^1\text{H}$  NMR spectroscopy in  $\text{CD}_3\text{CN}$   $\lambda_{\text{irr}} \geq 610$  nm at 0, 5, 20, and 60 minutes. Integrations relative to a benzene internal standard are listed next to the corresponding peaks. The resonance at 2.29 ppm corresponds to the bound  $\text{CH}_3\text{CN}$ , the

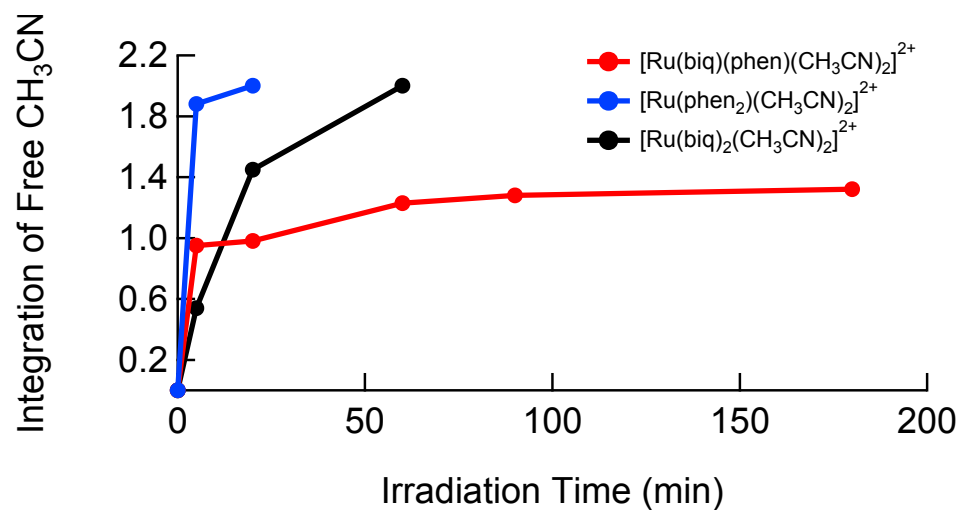

**Figure S13.** Plot of the integration of free CH<sub>3</sub>CN produced vs irradiation time for **1** ( $\lambda_{\text{irr}} \geq 455$  nm), **2** ( $\lambda_{\text{irr}} \geq 455$  nm), and **3** ( $\lambda_{\text{irr}} \geq 610$  nm) in CD<sub>3</sub>CN, where the integration corresponding to the three protons of CH<sub>3</sub>CN are normalized to 1.0.

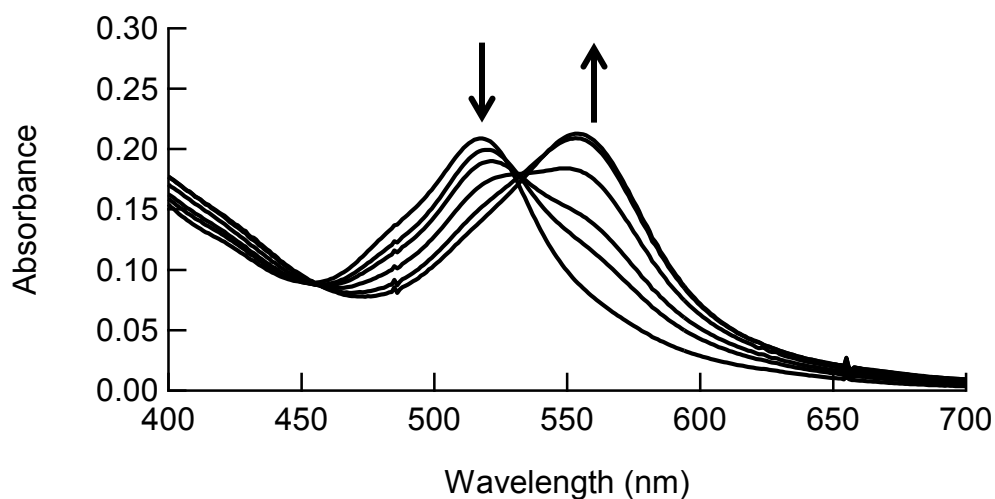

**Figure S14.** Photolysis of the intermediate [Ru(biq)(phen)(CH<sub>3</sub>CN)(H<sub>2</sub>O)]<sup>2+</sup> (**4**) in water over a time period of 3 hours ( $\lambda_{\text{irr}} \geq 420$  nm).

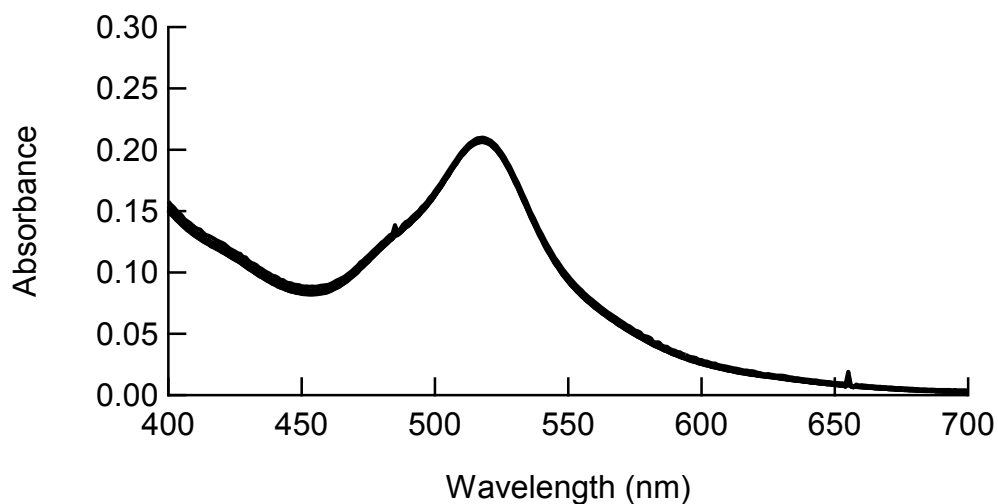

**Figure S15.** Thermal Stability of the intermediate  $[\text{Ru}(\text{biq})(\text{phen})(\text{CH}_3\text{CN})(\text{H}_2\text{O})]^{2+}$  (**4**) in water over 3 hrous.

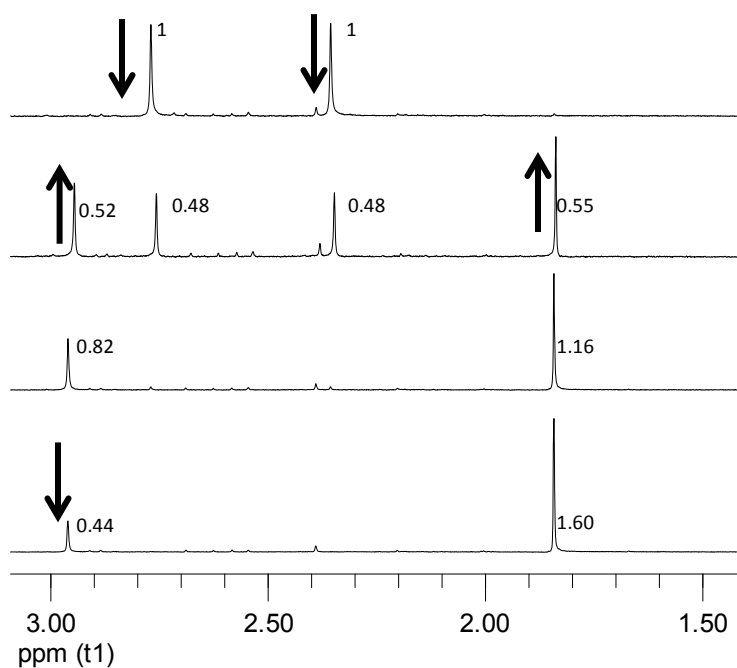

**Figure S16.** Photolysis of **1** monitored by  $^1\text{H}$  NMR spectroscopy in  $\text{py}-d_5$   $\lambda_{\text{irr}} \geq 550$  nm at 0, 5, 20, and 60 minutes. Integrations relative to a benzene internal standard are listed next to the corresponding peaks. The initial resonances at 2.35 and 2.75 correspond to bound  $\text{CH}_3\text{CN}$  ligands. The resonances at 2.95 and 1.84 correspond to the bound  $\text{CH}_3\text{CN}$  of the intermediate and free  $\text{CH}_3\text{CN}$ , respectively.

### 3. Calculations

**Table S2.** 5 lowest energy singlet excited states obtained from DFT calculations, and the transitions associated with these states in CH<sub>3</sub>CN (H = HOMO, L = LUMO) for complex **1'**.

| Wavelength (nm) | <i>f</i> | Calculated Transitions and Orbital Contributions |
|-----------------|----------|--------------------------------------------------|
| 476.33          | 0.0002   | H→L(95%), H-3→L(2%)                              |
| 443.15          | 0.0646   | H-1→L(67%), H-2→L(29%)                           |
| 429.34          | 0.0524   | H-2→L(65%), H-1→L(27%)                           |
| 401.57          | 0.0134   | H→L+1(82%), H-1→L+1(7%), H-2→L+1(5%)             |
| 390.14          | 0.0043   | H-1→L+1(88%), H→L+1(5%), H-5→L+1(3%)             |

**Table S3.** 5 lowest energy singlet excited states obtained from DFT calculations, and the transitions associated with these states in CH<sub>3</sub>CN (H = HOMO, L = LUMO) for complex **2'**.

| Wavelength (nm) | <i>f</i> | Calculated Transitions and Orbital Contributions               |
|-----------------|----------|----------------------------------------------------------------|
| 395.88          | 0.0024   | H→L+1(81%), H-2→L+1(17%)                                       |
| 395.16          | 0.0093   | H→L(91%), H-2→L(7%)                                            |
| 383.54          | 0.0054   | H-1→L+1(82%), H-2→L(15%)                                       |
| 373.92          | 0.1128   | H-2→L(71%), H-1→L+1(14%), H→L(6%), H→L+3(5%)                   |
| 369.01          | 0.0065   | H→L+2(43%), H-2→L+1(36%), H-1→L(8%), H→L+1(6%),<br>H-2→L+2(3%) |

**Table S4.** 5 lowest energy singlet excited states obtained from DFT calculations, and the transitions associated with these states in CH<sub>3</sub>CN (H = HOMO, L = LUMO) for complex **3'**.

| Wavelength (nm) | <i>f</i> | Calculated Transitions and Orbital Contributions |
|-----------------|----------|--------------------------------------------------|
| 495.97          | 0.0008   | H→L(93%), H-1→L(3%), H-7→L(2%)                   |
| 474.83          | 0.1015   | H-1→L(94%), H→L(2%)                              |
| 463.45          | 0.0006   | H-2→L(47%), H→L+1(43%), H-3→L(3%), H-5→L(2%)     |
| 458.98          | 0.0006   | H→L+1(49%), H-2→L(40%), H-3→L(5%), H-1→L+1(3%)   |
| 431.52          | 0.0007   | H-2→L+1(83%), H-3→L+1(11%), H-5→L+1(5%)          |

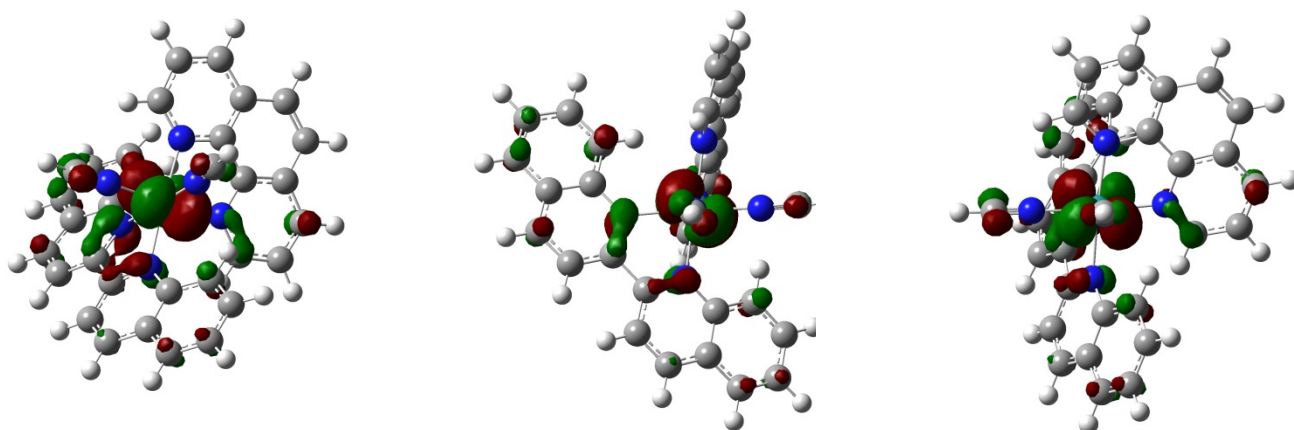

**Figure S17.** Different views of the calculated HOMO in **1'** on geometric optimized structures.

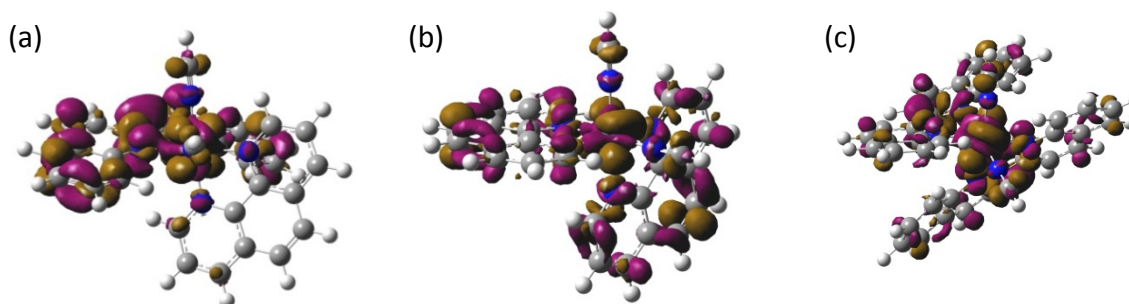

**Figure S18.** The resulting difference density surface plots of the lowest energy  $^3\text{MLCT}$  state for (a) **1'**, (b) **2'**, and (c) **3'**. Brown represents removal of electron density and purple represents addition of electron density upon vertical excitation from the minimized singlet ground state.

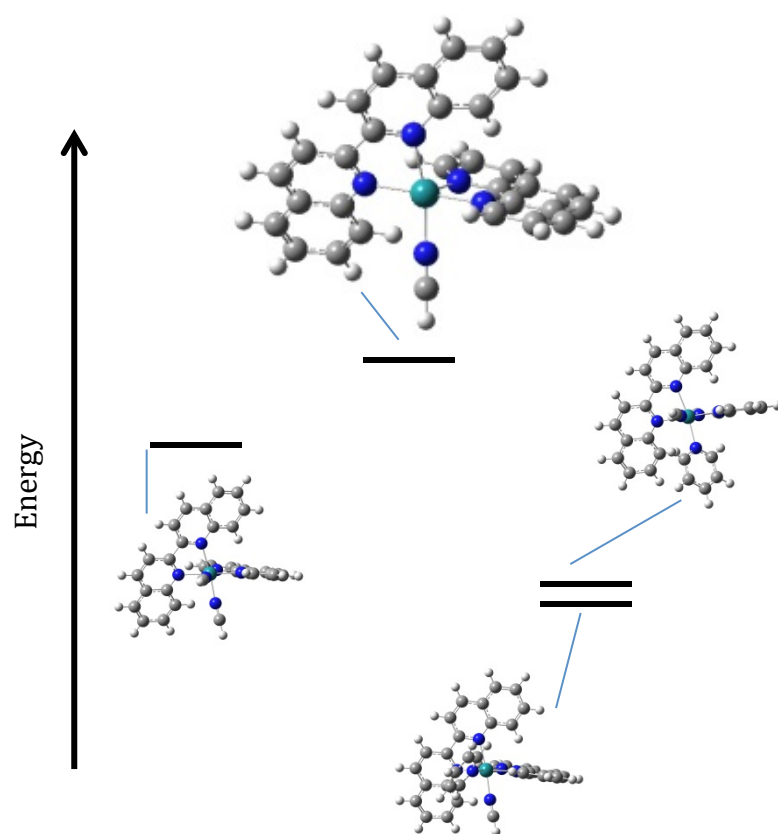

**Figure S19.** Reaction coordinate representing the possible route to the monosubstituted product upon irradiation in pyridine. The energies of each species are not drawn to scale and the five coordinate intermediate is enlarged for clarity.
